# Supplementary material for: Shape memory polymer foams prepared from a heparin-inspired polyurethane/urea
Source: Royal Society of Chemistry journal article supplement (doi:10.1039/c7py00204a), 2017-01-01
Supplement: c7py00204a1.pdf [file c7py00204a1.pdf]

**Shape memory polymer foams prepared from a heparin-inspired  
polyurethane/urea**

*Qinyuan Chai<sup>a</sup>, Yongshun Huang,<sup>a</sup> Terence L. Kirley,<sup>b</sup> and Neil Ayres<sup>a\*</sup>*

<sup>a</sup>:Department of Chemistry, The University of Cincinnati, P.O. Box 210172,  
Cincinnati, OH, 45221

<sup>b</sup>:Department of Pharmacology and Cell Biophysics, College of Medicine, The  
University of Cincinnati, P.O. Box 670575, Cincinnati, OH, 45267

**Contents**

Figure S1. <sup>1</sup>H NMR spectra of (a) lactose containing diamine and (b) the **Page S2**  
corresponding prepolymer.

Figure S2. Photograph and SEM image of the prepared salt template. **Page S2**  
(The circle showed example areas salt particles were fused together.)

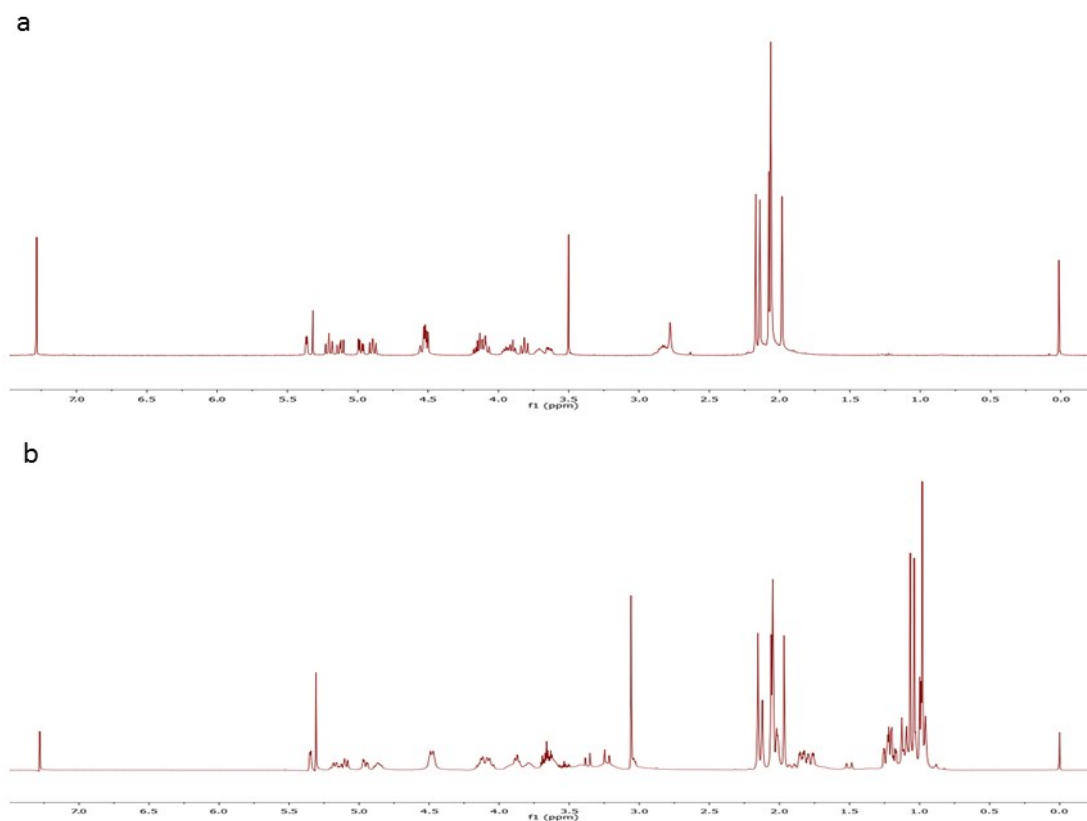

Figure S1.  $^1\text{H}$  NMR spectra of (a) lactose containing diamine and (b) the prepolymer with isophorone diisocyanate.

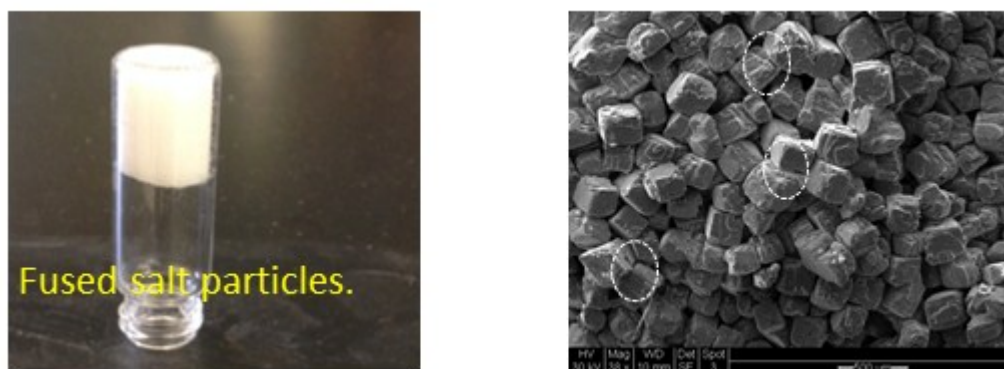

Figure S2. Photograph (left) and SEM image (right) of the prepared salt template. The circles show areas where the salt particles are fused together.
